# Supplementary material for: 3D hyperbranched heterostructures of Ag nanocrystals-decorated ZnO nanopillars: controlled growth and characterization of the optical properties
Source: Royal Society of Chemistry journal article supplement (doi:10.1039/c7ce01159h), 2017-01-01
Supplement: c7ce01159h1.pdf [file c7ce01159h1.pdf]

## Supplementary Information of 3D Hyperbranched Heterostructures of Ag Nanocrystals Decorated ZnO Nanopillars: Controlled Growth and Optical Properties Characterization

S. N. H. Daud<sup>a</sup>, C. Y. Haw<sup>a,b,†</sup>, W. S. Chiu<sup>a,\*</sup>, Z. Aspanut<sup>a</sup>, N. A. Jani<sup>a,c</sup>, P.

S. Khiew<sup>d</sup>, Y. C. Lim<sup>e</sup>, M. A. Abd. Hamid<sup>e</sup>, A. M. Ali<sup>f</sup>

<sup>a</sup>*Low Dimensional Materials Research Centre, Department of Physics, Faculty of Science, University of Malaya, 50603, Lembah Pantai, Kuala Lumpur, Malaysia*

<sup>b</sup>*School of Engineering, Xiamen University Malaysia, Jalan Sunsuria, Bandar Sunsuria, 43900 Sepang, Selangor, Malaysia*

<sup>c</sup>*Faculty of Applied Sciences, University Teknologi MARA, Shah Alam, 40450, Selangor, Malaysia*

<sup>d</sup>*Faculty of Engineering, University of Nottingham Malaysia Campus, 43500, Semenyih, Selangor, Malaysia*

<sup>e</sup>*School of Applied Physics, Faculty of Science & Technology, Universiti Kebangsaan Malaysia, 43600, Bangi, Selangor, Malaysia*

<sup>f</sup>*Physics Department, Faculty of Science, King Khalid University, Abha, 9004, Saudi Arabia*

\*Corresponding author: \*[w.s.chiu@um.edu.my](mailto:w.s.chiu@um.edu.my), †[cyhaw@xmu.edu.my](mailto:cyhaw@xmu.edu.my)

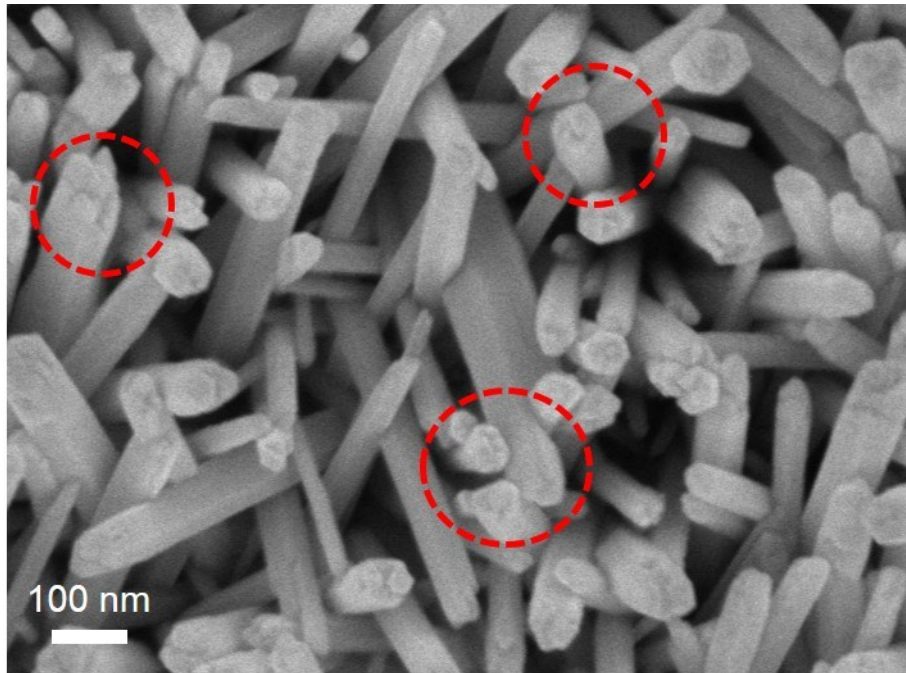

**Fig. S1.** Magnified region of primary ZnO NPLs where the red dotted-circles show the rough surface or defects formed on the tips and upper half edges of nanopillars.

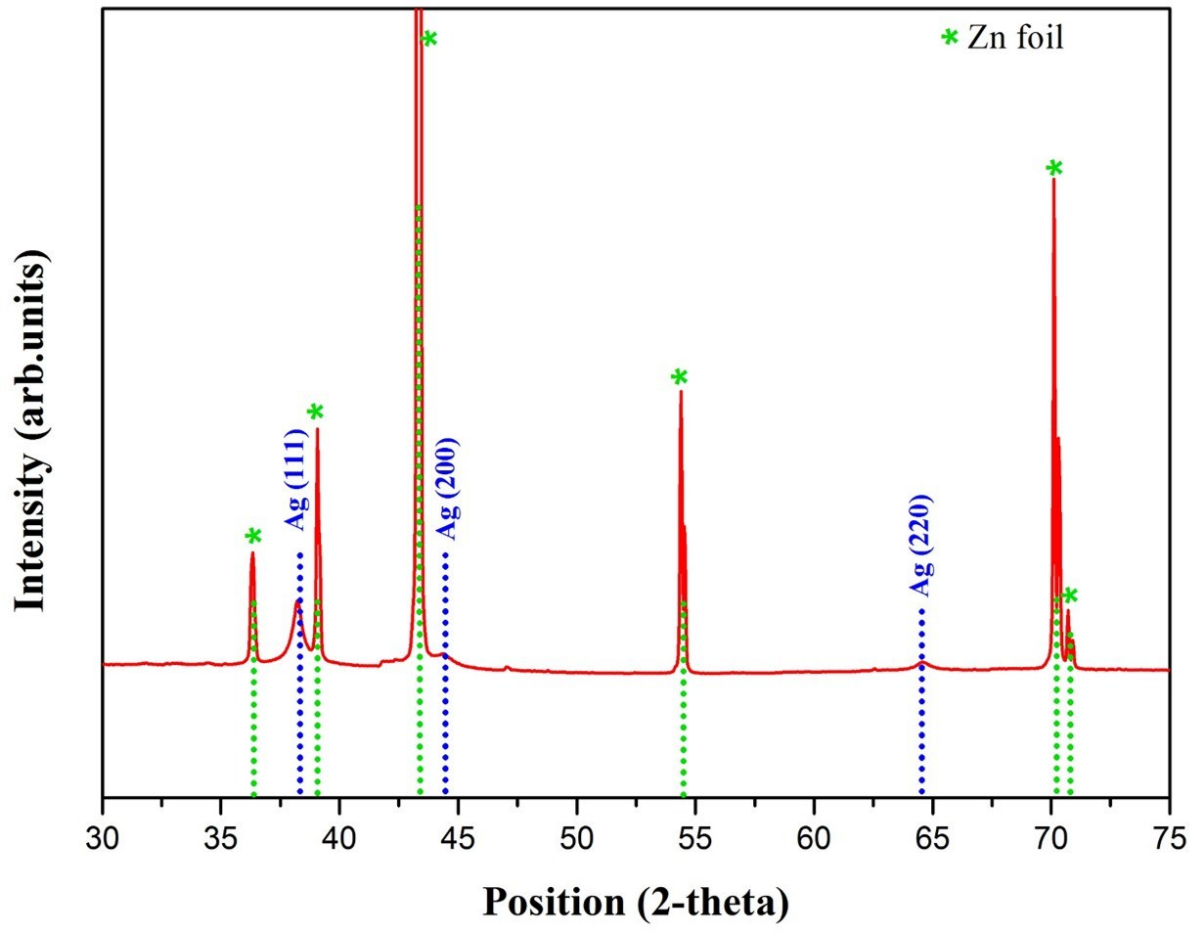

Fig. S2. XRD pattern of metallic Ag on the surface of Zn foil
